# Supplementary material
Source: PubMed Central journal article supplement (PMC6548871)
Supplement: NIHMS1032182-supplement-Supplemental_Figures.pdf [file NIHMS1032182-supplement-Supplemental_Figures.pdf]

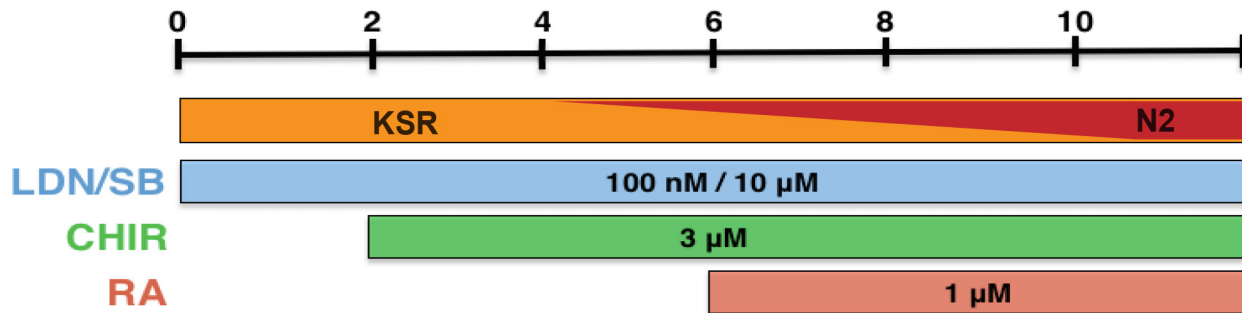

Supplementary Figure 1

**Protocol (days 0-12) for ENC induction using option A.**

KSR, knockout serum replacement differentiation medium; LDN, LDN-193189, SB, SB431542, CHIR, CHIR 99021; RA, Retinoic Acid; SB, SB431542.

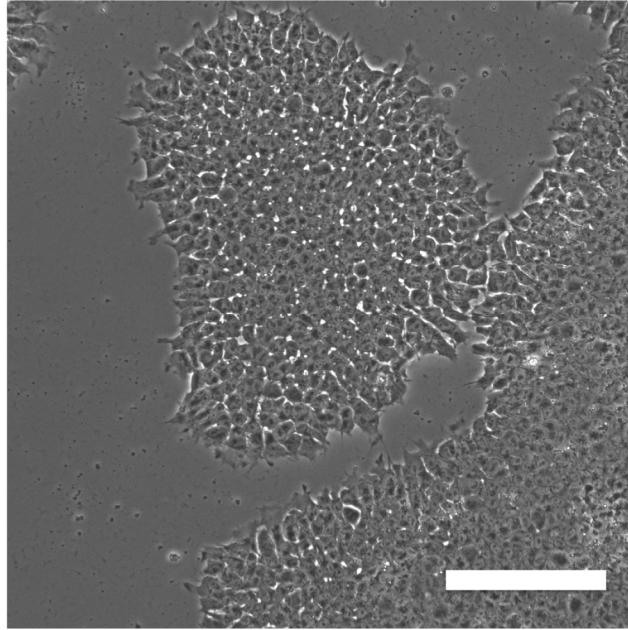

**Supplementary Figure 2**

Representative phase contrast image of WA09 embryonic stem cells cultured in E8 medium.  
Scale bar = 100  $\mu\text{m}$ .

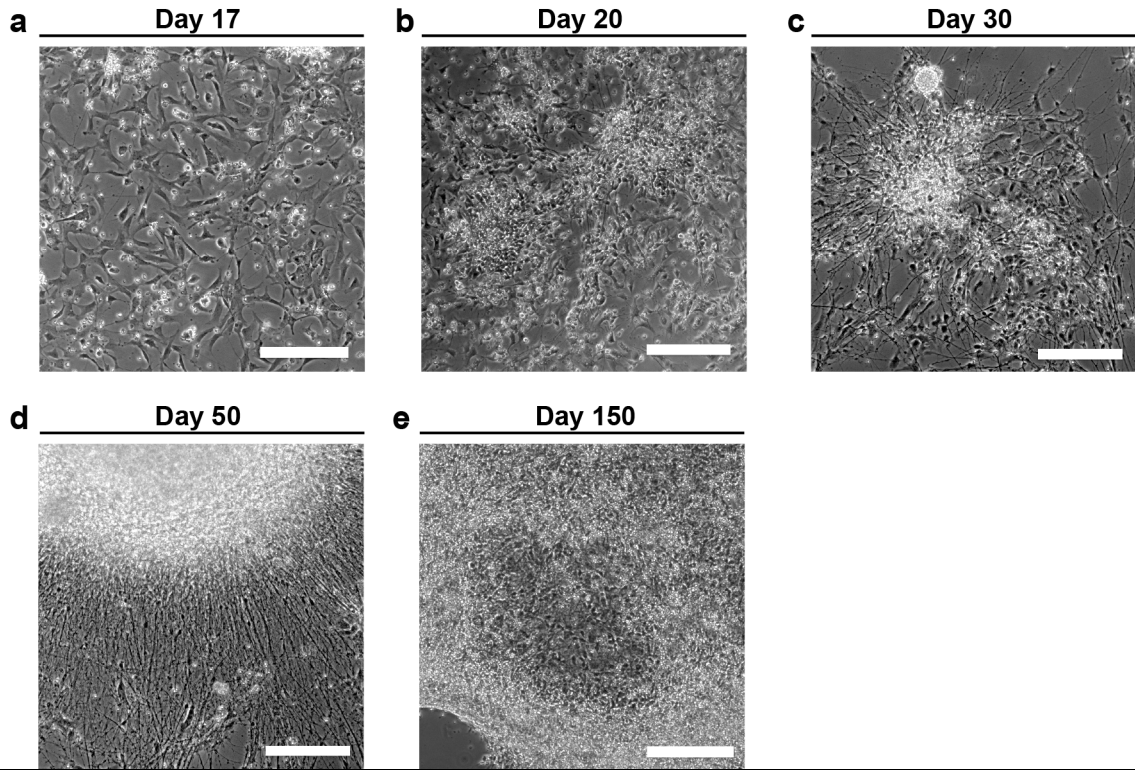

**Supplementary Figure 3**

**Representative phase contrast images of differentiating cells at different time points of EN induction.**  
Scale bar = 200  $\mu\text{m}$ .

**a**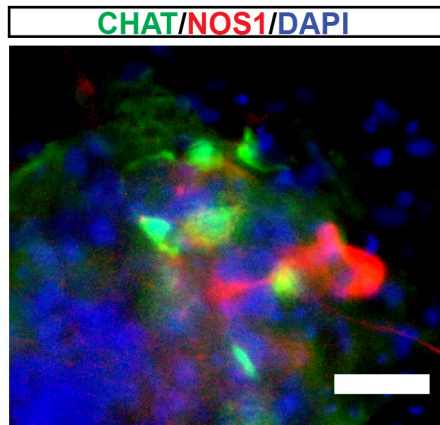**b**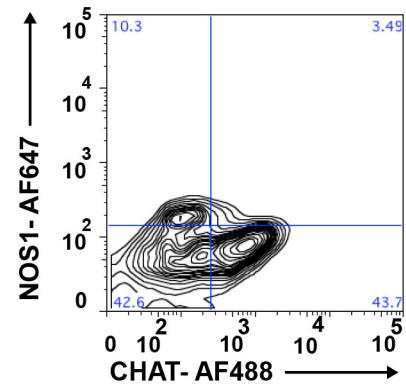**Supplementary Figure 4****Distinct populations of NOS1+ and CHAT+ cells in hESC-derived EN cultures.**

a) Immunofluorescence staining of NOS1 and CHAT on day 75 of EN induction. b) Flow cytometry analysis of NOS1 and CHAT expression on day 75 on EN induction. AF647, Alexa Fluor™ 647; AF488, Alexa Fluor™ 488. Scale bar = 20 μm.

**a****Phase contrast**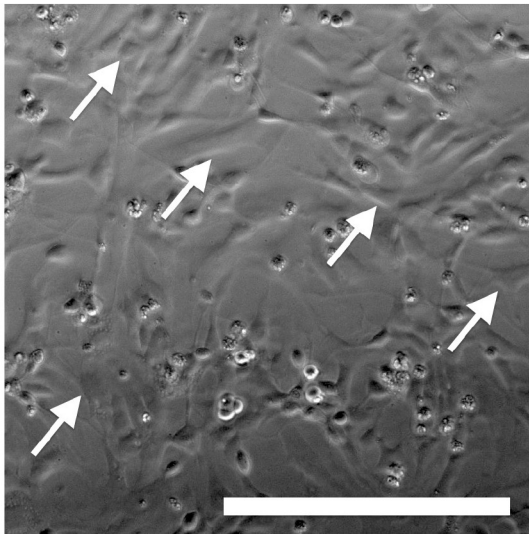**b****TUJ1/SMA/DAPI**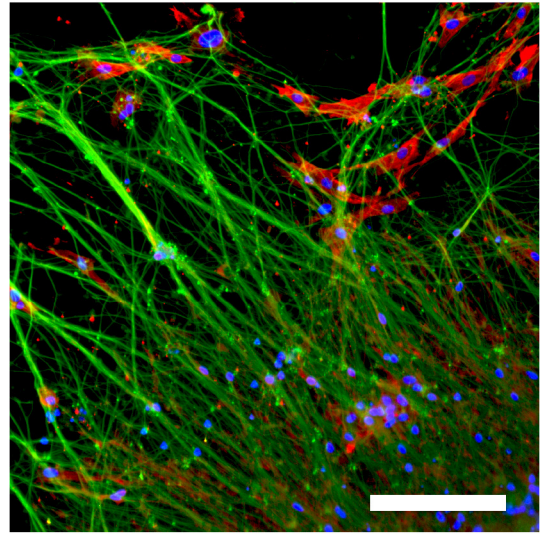**Supplementary Figure 5****Characterization of contaminating cells in hESC-derived EN cultures.**

a) Phase contrast image of low density regions of culture plates on day 75 of differentiation. Arrows point to flat non-neuronal contaminating cells. b) Immunofluorescence staining of EN cultures with SMA and TUJ1 on day 75 of differentiation. Scale bar = 100  $\mu$ m in a and 200  $\mu$ m in b.

**a**

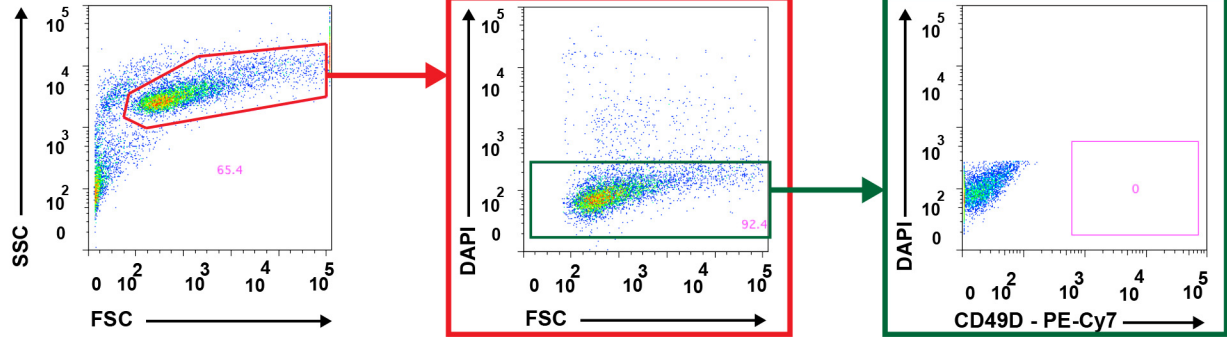

**b**

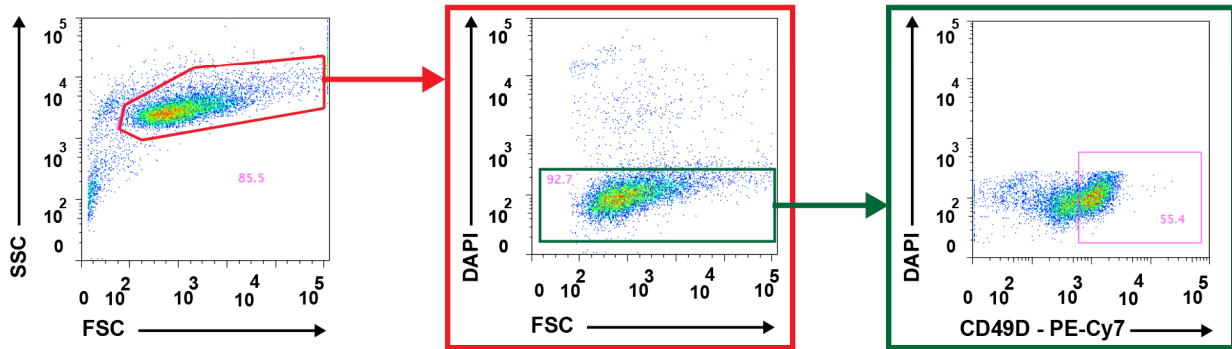

Supplementary Figure 6

Example of FACS gating strategy for purification of CD49D+ ENC<sub>s</sub> on day 12 of differentiation.

a) Unstained control sample. b) Sample stained with CD49D.
