# Supplementary material
Source: PubMed Central journal article supplement (PMC6548871)
Supplement: NIHMS1032182-supplement-Supplemental_Tables.pdf [file NIHMS1032182-supplement-Supplemental_Tables.pdf]

**Supplementary Table 1. List of primers**

| <b>Primer</b> | <b>Company</b> | <b>Cat. no.</b> |
|---------------|----------------|-----------------|
| ASCL1         | Qiagen         | QT00058380      |
| EDNRB         | Qiagen         | QT00014343      |
| HOXB3         | Qiagen         | QT00093898      |
| HOXB5         | Qiagen         | QT00026740      |
| GAPDH         | Qiagen         | QT00079247      |
| PAX3          | Qiagen         | QT00009275      |
| PHOX2B        | Qiagen         | QT00015078      |
| TUJ1          | Qiagen         | QT00089775      |

**Supplementary Table 2. List of antibodies**

| <b>Antibody</b> | <b>Species</b> | <b>Company</b> | <b>Cat. no.</b> | <b>Dilution for staining</b> |
|-----------------|----------------|----------------|-----------------|------------------------------|
| 5-HT            | Rabbit         | Sigma          | S5545           | 1:1000                       |
| GABA            | Rabbit         | Sigma          | A2052           | 1:1000                       |
| nNOS            | Rabbit         | Santa Cruz     | sc648           | 1:200                        |
| TUJ1            | Mouse          | BioLegend      | 801202          | 1:1000                       |
